# Supplementary material
Source: PubMed Central journal article supplement (PMC6461084)
Supplement: IORT_A_1554418_SM1288.pdf [file IORT_A_1554418_SM1288.pdf]

## Supplementary data

## Appendix 1: ICD 10 and NOMESCO codes used for definition of adverse events

Table 1. Source of included variables

| Variables                                    | Hospital medical records | SHAR | Regional patient register | HOSP |
|----------------------------------------------|--------------------------|------|---------------------------|------|
| 10-digit PIN                                 | X                        | X    | X                         |      |
| Age                                          | X                        | X    | X                         |      |
| Sex                                          | X                        | X    |                           |      |
| BMI                                          |                          | X    |                           |      |
| Name of hospital                             | X                        | X    | X                         |      |
| Level of hospital                            | X                        | X    | X                         |      |
| Date of surgery                              | X                        | X    | X                         |      |
| Name of surgeon                              | X                        |      |                           |      |
| Date of license to practise                  |                          |      |                           | X    |
| Date of orthopedic specialist certification  |                          |      |                           | X    |
| Diagnosis for implantation                   | X                        | X    |                           |      |
| Fixation technique                           | X                        | X    |                           |      |
| ICD-10 codes 365-days prior to the index THA |                          |      | X                         |      |
| ICD-10 codes within 90 days postoperatively  |                          |      | X                         |      |
| Mortality within 90 days post-operatively    |                          | X    |                           |      |

PIN = personal identity number, BMI = body mass index, ICD = International Codes of Diseases, SHAR = Swedish Hip Arthroplasty Register, HOSP = Swedish National Board of Health and Welfare register of licensed healthcare professionals.

DA Diagnosis for complications (ICD-10 codes). Whether they occur as main or secondary diagnosis for readmission

|        |                                                                                                               |
|--------|---------------------------------------------------------------------------------------------------------------|
| G97.8  | Other postprocedural disorders of nervous system                                                              |
| G97.9  | Postprocedural disorder of nervous system, unspecified                                                        |
| M96.6F | Fracture of bone following insertion of orthopedic implant, joint prosthesis, or bone plate                   |
| M96.8  | Other postprocedural musculoskeletal disorders                                                                |
| M96.9  | Postprocedural musculoskeletal disorder, unspecified                                                          |
| T81.0  | Hemorrhage and hematoma complicating a procedure, not elsewhere classified                                    |
| T81.2  | Accidental puncture and laceration during a procedure, not elsewhere classified                               |
| T81.3  | Disruption of operation wound, not elsewhere classified                                                       |
| T81.4  | Infection following a procedure, not elsewhere classified                                                     |
| T81.5  | Foreign body accidentally left in body cavity or operation wound following a procedure                        |
| T81.6  | Acute reaction to foreign substance accidentally left during a procedure                                      |
| T81.7  | Vascular complications following a procedure, not elsewhere classified                                        |
| T81.8  | Other complications of procedures, not elsewhere classified                                                   |
| T81.8W | Other complications of procedures, not elsewhere classified                                                   |
| T81.9  | Unspecified complication of procedure                                                                         |
| T84.0  | Mechanical complication of internal joint prosthesis                                                          |
| T84.0F | Mechanical complication of internal joint prosthesis                                                          |
| T84.3  | Mechanical complication of other bone devices, implants, and grafts                                           |
| T84.3F | Mechanical complication of other bone devices, implants, and grafts                                           |
| T84.4  | Mechanical complication of other internal orthopedic devices, implants, and grafts                            |
| T84.5  | Infection and inflammatory reaction due to internal joint prosthesis                                          |
| T84.5F | Infection and inflammatory reaction due to internal joint prosthesis                                          |
| T84.7  | Infection and inflammatory reaction due to other internal orthopedic prosthetic devices, implants, and grafts |
| T84.7F | Infection and inflammatory reaction due to other internal orthopedic prosthetic devices, implants, and grafts |
| T84.8  | Other complications of internal orthopedic prosthetic devices, implants, and grafts                           |
| T84.8F | Other complications of internal orthopedic prosthetic devices, implants, and grafts                           |
| T84.9  | Unspecified complication of internal orthopedic prosthetic device, implant, and graft                         |
| T88.8  | Other specified complications of surgical and medical care, not elsewhere classified                          |
| T88.9  | Complication of surgical and medical care, unspecified                                                        |

F = hip/femur, W = cause of the injury fall/object

**BD Diagnosis for hip-related complications (ICD-10 codes). Whether they occur as main or secondary diagnosis for readmission**

|        |                                                                             |
|--------|-----------------------------------------------------------------------------|
| G57.0  | Lesion of sciatic nerve                                                     |
| G57.1  | Meralgia paraesthetica                                                      |
| G57.2  | Lesion of femoral nerve                                                     |
| M00.0  | Staphylococcal arthritis and polyarthritis                                  |
| M00.0F | Staphylococcal arthritis and polyarthritis                                  |
| M00.2F | Other streptococcal arthritis and polyarthritis                             |
| M00.8F | Arthritis and polyarthritis due to other specified bacterial agents         |
| M00.9F | Pyogenic arthritis, unspecified                                             |
| M24.3  | Pathological dislocation and subluxation of joint, not elsewhere classified |
| M24.4  | Recurrent dislocation and subluxation of joint                              |
| M24.4F | Recurrent dislocation and subluxation of joint                              |
| S73.0  | Dislocation of hip                                                          |
| S74*   | Injury of nerves at hip and thigh level                                     |
| S75*   | Injury of femoral artery                                                    |
| S76*   | Injury of muscle and tendon of hip                                          |

F = hip/femur

**BD2 Diagnosis for hip-related complications (ICD-10 codes). Whether they occur as main diagnosis for readmission**

|        |                                         |
|--------|-----------------------------------------|
| M24.0F | Loose body in joint                     |
| M24.5F | Contracture of joint                    |
| M24.6F | Ankylosis of joint                      |
| M61.0F | Myositis ossificans traumatica          |
| M62.1F | Other rupture of muscle (nontraumatic)  |
| M66.2F | Spontaneous rupture of extensor tendons |
| M66.3F | Spontaneous rupture of flexor tendons   |
| M84.3F | Stress fracture                         |
| M86.0F | Acute hematogenous osteomyelitis        |
| M86.1F | Other acute osteomyelitis               |
| M86.6  | Other chronic osteomyelitis, hip/femur  |
| M86.6F | Other chronic osteomyelitis             |
| M89.5E | Osteolysis                              |

F = hip/femur, E = pelvis

**DC Diagnosis for serious cardiovascular complication (ICD-10 codes). Whether they occur as main or secondary diagnosis for readmission**

|       |                                                                                      |
|-------|--------------------------------------------------------------------------------------|
| I21.* | Acute myocardial infarction                                                          |
| I24.* | Other acute ischemic heart diseases                                                  |
| I26.0 | Pulmonary embolism with mention of acute cor pulmonale                               |
| I26.9 | Pulmonary embolism without mention of acute cor pulmonale                            |
| I46.0 | Cardiac arrest with successful resuscitation                                         |
| I46.1 | Sudden cardiac death, so described                                                   |
| I46.9 | Cardiac arrest, unspecified                                                          |
| I49.0 | Ventricular fibrillation and flutter                                                 |
| I60.* | Subarachnoid hemorrhage                                                              |
| I61.* | Intracerebral hemorrhage                                                             |
| I62.* | Other nontraumatic intracranial hemorrhage                                           |
| I63.* | Cerebral infarction                                                                  |
| I64.9 | Stroke, not specified as hemorrhage or infarction                                    |
| I65.* | Occlusion and stenosis of precerebral arteries, not resulting in cerebral infarction |
| I66.* | Occlusion and stenosis of cerebral arteries, not resulting in cerebral infarction    |
| I72.* | Other aneurysm and dissection                                                        |
| I74.* | Arterial embolism and thrombosis                                                     |
| I77.0 | Arteriovenous fistula, acquired                                                      |
| I77.1 | Stricture of artery                                                                  |
| I77.2 | Rupture of artery                                                                    |
| I81.9 | Portal vein thrombosis                                                               |
| I82.* | Other venous embolism and thrombosis                                                 |
| I97.8 | Other postprocedural disorders of circulatory system, not elsewhere classified       |
| I97.9 | Postprocedural disorder of circulatory system, unspecified                           |
| J80.9 | Adult respiratory distress syndrome                                                  |
| J81.9 | Pulmonary edema                                                                      |
| T81.1 | Shock during or resulting from a procedure, not elsewhere classified                 |

**DM Diagnosis of medical complication (ICD-10 codes). Whether they occur as main or secondary diagnosis for readmission**

|       |                                                                       |
|-------|-----------------------------------------------------------------------|
| I80*  | Phlebitis and thrombophlebitis                                        |
| J95.2 | Acute pulmonary insufficiency following nonthoracic surgery           |
| J95.3 | Chronic pulmonary insufficiency following surgery                     |
| J95.5 | Postprocedural subglottic stenosis                                    |
| J95.8 | Other postprocedural respiratory disorders                            |
| J95.9 | Postprocedural respiratory disorder, unspecified                      |
| J96*  | Respiratory failure, not elsewhere classified                         |
| J98.1 | Pulmonary collapse                                                    |
| K25.* | Gastric ulcer                                                         |
| K26.* | Duodenal ulcer                                                        |
| K27.* | Peptic ulcer, site unspecified                                        |
| L89*  | Decubitus ulcer and pressure area                                     |
| N17.* | Acute renal failure                                                   |
| N99.0 | Postprocedural renal failure                                          |
| N99.8 | Other postprocedural disorders of genitourinary system                |
| N99.9 | Postprocedural disorder of genitourinary system, unspecified          |
| R33.9 | Retention of urine                                                    |
| J13.* | Pneumonia due to Streptococcus pneumoniae                             |
| J14.* | Pneumonia due to Haemophilus influenzae                               |
| J15.* | Bacterial pneumonia, not elsewhere classified                         |
| J16.* | Pneumonia due to other infectious organisms, not elsewhere classified |
| J17.* | Pneumonia in diseases classified elsewhere                            |
| J18.* | Pneumonia, organism unspecified                                       |

**DM 2 Diagnosis of medical complication (ICD-10 codes). Whether they occur as main diagnosis for readmission**

|       |                                               |
|-------|-----------------------------------------------|
| K29.* | Gastritis and duodenitis                      |
| K59.0 | Constipation                                  |
| N99.1 | Postprocedural urethral stricture             |
| J20.* | Acute bronchitis                              |
| J21.* | Acute bronchiolitis                           |
| J22.* | Unspecified acute lower respiratory infection |

**A Codes for hip surgery (NOMESCO). Whether they occur as main procedure during the readmission**

|       |                                                                  |
|-------|------------------------------------------------------------------|
| NFA02 | Exploration of soft tissue in hip or thigh, open surgery         |
| NFA11 | Diagnostic arthroscopy of hip joint                              |
| NFA12 | Exploration of hip joint, open surgery                           |
| NFA20 | Biopsy of soft tissue in hip joint/femur, percutaneous           |
| NFA21 | Biopsy of hip joint, arthroscopic                                |
| NFA22 | Biopsy of hip joint, open surgery                                |
| NFC*  | Revision hip arthroplasty                                        |
| NFF*  | Surgery on synovial membranes or joint surfaces, hip point/femur |
| NFG*  | Reconstruction or arthrodesis, hip point/femur                   |
| NFH*  | Surgery due to dislocation or loose body, hip point/femur        |
| NFJ*  | Surgery due to fracture, hip point/femur                         |
| NFK*  | Surgery on the bony structures, hip point/femur                  |
| NFL*  | Surgery on muscle or tendon, hip point/femur                     |
| NFM*  | Surgery on fascia and "bursa," hip point/femur                   |
| NFQ09 | Exarticulation of the hip joint                                  |
| NFS*  | Surgery due to infection, hip point/femur                        |
| NFT*  | Reconstructive surgery, hip point/femur                          |
| NFU*  | Extractions of implants, hip point/femur                         |
| NFW*  | Reoperations, hip point/femur                                    |
| QDA10 | Incision                                                         |
| QDB*  | Suture, wound readjustment, wound dressing                       |
| QDE35 | Reconstruction of defective skin                                 |
| QDG30 | Secondary suture                                                 |
| TNF05 | Incision (abscess)                                               |
| TNF10 | Arthrocentesis of hip joint                                      |

NOMESCO = Nordic Medico-Statistical Committee.
